# Supplementary material for: 4-PBA Attenuates Fat Accumulation in Cultured Spotted Seabass Fed High-Fat-Diet via Regulating Endoplasmic Reticulum Stress
Source: MDPI journal article supplement (doi:10.3390/metabo12121197), 2022-11-30
Supplement: s1 [file s1]

## Supplementary Material

Table S1. Formulation and proximate composition of experimental diets.

| Ingredients (g/kg)                  | NFD   | HFD   |
|-------------------------------------|-------|-------|
| Fish meal                           | 268.5 | 268.5 |
| Poultry meal                        | 84.7  | 84.7  |
| Wheat gluten                        | 73    | 87.5  |
| Soybean meal                        | 250   | 250   |
| $\alpha$ -starch                    | 30    | 30    |
| Wheat flour                         | 201.1 | 125.1 |
| Fish oil                            | 19.3  | 50    |
| Soybean oil                         | 19.3  | 50    |
| Soybean Lecithin                    | 20    | 20    |
| Premix1                             | 13.5  | 13.5  |
| Calcium biphosphate                 | 20.8  | 20.8  |
| <b>Proximate composition (g/kg)</b> |       |       |
| Moisture                            | 49.3  | 37.4  |
| Protein                             | 438.6 | 436.9 |
| Lipid                               | 110.7 | 168.6 |
| Ash                                 | 85.7  | 84.8  |

1Premix supplied the following minerals (g/kg) and vitamins (IU or mg/kg):  $\text{CuSO}_4 \cdot 5\text{H}_2\text{O}$ , 2.0 g;  $\text{FeSO}_4 \cdot 7\text{H}_2\text{O}$ , 25 g;  $\text{ZnSO}_4 \cdot 7\text{H}_2\text{O}$ , 22 g;  $\text{MnSO}_4 \cdot 4\text{H}_2\text{O}$ , 7 g;  $\text{Na}_2\text{SeO}_3$ , 0.04 g; KI, 0.026 g;  $\text{CoCl}_2 \cdot 6\text{H}_2\text{O}$ , 0.1 g; Vitamin A, 900000 IU; Vitamin D, 200000 IU; Vitamin E, 4500 mg; Vitamin K3, 220 mg; Vitamin B<sub>1</sub>, 320 mg; Vitamin B<sub>2</sub>, 1090 mg; Niacin, 2800 mg; Vitamin B<sub>5</sub>, 2000 mg; Vitamin B<sub>6</sub>, 500 mg; Vitamin B<sub>12</sub>, 1.6 mg; Vitamin C, 5000 mg; Pantothenate, 1000 mg; Folic acid, 165 mg; Choline, 60000 mg.

Table S2. Sequences of primers used for RT-qPCR.

| Target gene     | Primer sequence (5'-3')                                 | Amplification efficiency |
|-----------------|---------------------------------------------------------|--------------------------|
| <i>β-actin1</i> | F: TCGAGCACGGTATTGTGACC<br>R: TCAGGTGCAACTCTCAGCTC      | 99.87%                   |
| <i>grp78</i>    | F: GGGAGAAGAGGAGAAAGGTCTG<br>R: GCTTATCACCGCTCCGCTT     | 99.65%                   |
| <i>chop</i>     | F: TGGGAGAAGAGGAGAAAGGTCT<br>R: CTTATCACCGCTCCGCTTGG    | 99.98%                   |
| <i>perk</i>     | F: GTTTTCACCCCAGCAAGCAG<br>R: AACCTTAGTGTCGGCCTTGG      | 99.94%                   |
| <i>ire1</i>     | F: AAAGGTTGTTTCAGGGTGGCAT<br>R: GCAGCAATCAATCAACAAGCAAA | 99.79%                   |
| <i>atf-6</i>    | F: AACGAGCACTTGAGGAGAGC<br>R: CAGACGCTCACTCCTTGTGT      | 94.60%                   |
| <i>atf-4</i>    | F: GTGTTGGTGCTTTGGGAACG<br>R: CATCAGACTCGCCCCTGTTT      | 99.79%                   |
| <i>eif-2α</i>   | F: CTCTCCACACGAGGTGCTTC<br>R: TCGTGGTCTTCTGGGTGGTA      | 99.66%                   |
| <i>fas</i>      | F: AAAGTGAAGCCCTGTGTGCC<br>R: CACCCTGCCTATTACATTGCTC    | 98.80%                   |
| <i>srebp-1c</i> | F: CCTCACTCTGCAGCCAATCA<br>R: CGTAGTCCCACCCTCAAACC      | 99.48%                   |
| <i>acc</i>      | F: AAGGCGGTGGTGATGGATTT<br>R: GGCCATGTCGCCTTTGTTTT      | 99.79%                   |

*grp78*: glucose regulated protein 78; *chop*: C/EBP homology protein; *perk*: PKR-like endoplasmic reticulum kinase; *ire1*: inositol-requiring enzyme 1; *atf-6*: activating transcription factor 6; *atf-4*: activating transcription factor 4; *eif-2α*: eukaryotic initiation factor 2; *fas*: fatty acid synthetase; *srebp-1c*: sterol-regulation element binding protein-1c; *acc*: acetyl-coa carboxylase.

1Reference gene
